# Supplementary material for: Sensitivity studies of nighttime top-of-atmosphere radiances from artificial light sources using a 3-D radiative transfer model for nighttime aerosol retrievals
Source: Copernicus journal article supplement (doi:10.5194/amt-16-2531-2023), 2023-05-26
Supplement: Supplementary file 1 [file amt-16-2531-2023-supplement.pdf]

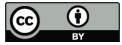

*Supplement of*

**Sensitivity studies of nighttime top-of-atmosphere radiances from artificial light sources using a 3-D radiative transfer model for nighttime aerosol retrievals**

**Jianglong Zhang et al.**

*Correspondence to:* Jianglong Zhang (jianglong.zhang@und.edu)

The copyright of individual parts of the supplement might differ from the article licence.

Table S1. List of nights with VIIRS data used in the analysis. Also included are the scene averaged lunar fraction, lunar phase angle, cosine lunar zenith angle and cosine satellite zenith angle. Highlighted nights are nights that were used for computing background emissions for Dakar. Nights highlighted with “\*” are nights that are used for constructing Figure 3.

| Year        | Month    | Day        | Lunar Fraction | Lunar Phase angle | Cosine Lunar Zenith Angle | Cosine satellite zenith angle |
|-------------|----------|------------|----------------|-------------------|---------------------------|-------------------------------|
| <b>2019</b> | <b>1</b> | <b>18*</b> | <b>86.26</b>   | <b>43.51</b>      | <b>0.38</b>               | <b>0.89</b>                   |
| <b>2019</b> | <b>1</b> | <b>19*</b> | <b>93.23</b>   | <b>30.17</b>      | <b>0.65</b>               | <b>0.98</b>                   |
| 2019        | 2        | 20         | 99.63          | 7.00              | 0.98                      | 0.98                          |
| 2019        | 2        | 21         | 96.74          | 20.79             | 0.98                      | 0.74                          |
| 2019        | 2        | 22         | 91.15          | 34.61             | 0.89                      | 0.49                          |
| 2019        | 2        | 23         | 82.81          | 48.99             | 0.90                      | 0.54                          |
| 2019        | 2        | 24         | 73.54          | 61.91             | 0.75                      | 0.80                          |
| 2019        | 2        | 25         | 63.50          | 74.34             | 0.53                      | 1.00                          |
| 2019        | 3        | 2          | 16.91          | 131.43            | -0.40                     | 0.97                          |
| 2019        | 3        | 3          | 10.59          | 142.03            | -0.62                     | 0.92                          |
| 2019        | 3        | 4          | 5.64           | 152.52            | -0.80                     | 0.65                          |
| <b>2019</b> | <b>3</b> | <b>7*</b>  | <b>0.35</b>    | <b>173.22</b>     | <b>-0.95</b>              | <b>0.90</b>                   |
| <b>2019</b> | <b>3</b> | <b>8*</b>  | <b>2.09</b>    | <b>163.36</b>     | <b>-0.98</b>              | <b>0.98</b>                   |
| 2019        | 3        | 9*         | 5.56           | 152.71            | -0.94                     | 0.74                          |
| 2019        | 3        | 10         | 10.70          | 141.81            | -0.84                     | 0.48                          |
| 2019        | 3        | 12         | 26.13          | 118.51            | -0.72                     | 0.80                          |
| 2019        | 3        | 14         | 45.75          | 94.88             | -0.27                     | 0.83                          |
| 2019        | 3        | 15         | 56.51          | 82.52             | 0.01                      | 0.56                          |
| 2019        | 3        | 16         | 68.05          | 68.84             | -0.07                     | 0.47                          |
| <b>2019</b> | <b>3</b> | <b>24*</b> | <b>87.31</b>   | <b>41.73</b>      | <b>0.83</b>               | <b>0.98</b>                   |
| 2019        | 3        | 26*        | 70.02          | 66.40             | 0.45                      | 0.48                          |
| 2019        | 4        | 7          | 3.33           | 158.97            | -0.90                     | 0.63                          |
| 2019        | 4        | 9          | 13.92          | 136.18            | -0.79                     | 0.98                          |
| 2019        | 4        | 12         | 42.15          | 99.03             | -0.48                     | 0.54                          |
| 2019        | 4        | 13         | 53.15          | 86.38             | -0.23                     | 0.81                          |
| <b>2019</b> | <b>4</b> | <b>15*</b> | <b>74.79</b>   | <b>60.28</b>      | <b>0.32</b>               | <b>0.83</b>                   |
| 2019        | 4        | 17*        | 92.20          | 32.44             | 0.46                      | 0.47                          |
| 2019        | 4        | 18         | 97.26          | 19.05             | 0.68                      | 0.71                          |
| 2019        | 4        | 21         | 96.43          | 21.78             | 0.87                      | 0.64                          |
| 2019        | 4        | 25         | 66.86          | 70.29             | 0.46                      | 0.98                          |
| 2019        | 4        | 26         | 57.49          | 81.38             | 0.24                      | 0.73                          |
| 2019        | 4        | 27         | 48.02          | 92.27             | 0.00                      | 0.48                          |

|             |           |            |              |               |              |             |
|-------------|-----------|------------|--------------|---------------|--------------|-------------|
| 2019        | 4         | 28         | 38.14        | 103.72        | 0.15         | 0.54        |
| 2019        | 4         | 29         | 29.36        | 114.38        | -0.08        | 0.81        |
| 2019        | 4         | 30         | 21.28        | 125.06        | -0.31        | 1.00        |
| 2019        | 5         | 4          | 0.90         | 169.13        | -0.72        | 0.71        |
| 2019        | 5         | 5          | 0.23         | 174.49        | -0.82        | 0.97        |
| 2019        | 5         | 9          | 19.11        | 128.16        | -0.74        | 0.62        |
| <b>2019</b> | <b>5</b>  | <b>21*</b> | <b>94.34</b> | <b>27.53</b>  | <b>0.80</b>  | <b>0.97</b> |
| <b>2019</b> | <b>5</b>  | <b>22*</b> | <b>88.74</b> | <b>39.22</b>  | <b>0.73</b>  | <b>0.92</b> |
| 2019        | 5         | 23*        | 81.72        | 50.63         | 0.61         | 0.64        |
| 2019        | 5         | 24*        | 73.64        | 61.78         | 0.43         | 0.42        |
| 2019        | 6         | 8          | 25.79        | 118.96        | -0.53        | 0.65        |
| 2019        | 6         | 15         | 94.28        | 27.69         | 0.37         | 0.54        |
| 2019        | 6         | 17         | 99.90        | 3.63          | 0.71         | 1.00        |
| 2019        | 6         | 20         | 92.30        | 32.21         | 0.80         | 0.47        |
| 2019        | 7         | 15         | 96.60        | 21.25         | 0.60         | 0.74        |
| 2019        | 7         | 18         | 98.59        | 13.64         | 0.80         | 0.80        |
| 2019        | 7         | 20         | 90.66        | 35.60         | 0.82         | 0.84        |
| 2019        | 8         | 10         | 73.62        | 61.81         | 0.00         | 0.92        |
| 2019        | 9         | 12         | 95.79        | 23.68         | 0.66         | 0.64        |
| 2019        | 9         | 17         | 92.28        | 32.27         | 0.96         | 0.74        |
| 2019        | 9         | 18         | 86.37        | 43.32         | 0.889        | 0.48        |
| 2019        | 10        | 2          | 15.27        | 133.99        | -0.94        | 0.98        |
| 2019        | 10        | 12         | 96.80        | 20.61         | 0.65         | 0.97        |
| 2019        | 10        | 13         | 99.18        | 10.38         | 0.83         | 0.92        |
| 2019        | 10        | 17         | 89.93        | 37.00         | 0.99         | 0.90        |
| 2019        | 10        | 20         | 64.99        | 72.56         | 0.56         | 0.48        |
| 2019        | 10        | 21         | 53.66        | 85.81         | 0.64         | 0.54        |
| 2019        | 10        | 27         | 1.58         | 165.57        | -0.70        | 0.71        |
| 2019        | 10        | 28         | 0.17         | 175.32        | -0.88        | 0.97        |
| <b>2019</b> | <b>10</b> | <b>29*</b> | <b>1.46</b>  | <b>166.13</b> | <b>-0.98</b> | <b>0.92</b> |
| 2019        | 10        | 30*        | 5.21         | 153.61        | -0.99        | 0.65        |
| 2019        | 10        | 31*        | 11.50        | 140.35        | -0.99        | 0.40        |
| 2019        | 11        | 1          | 18.99        | 128.33        | -0.95        | 0.62        |
| 2019        | 11        | 2          | 27.55        | 116.69        | -0.82        | 0.89        |
| 2019        | 11        | 3          | 36.74        | 105.38        | -0.64        | 0.98        |
| 2019        | 11        | 6*         | 65.37        | 72.09         | -0.28        | 0.54        |
| 2019        | 11        | 12         | 99.64        | 6.83          | 0.79         | 0.71        |
| 2019        | 11        | 14         | 97.53        | 18.10         | 0.99         | 0.92        |
| 2019        | 11        | 22*        | 24.52        | 120.64        | 0.05         | 0.54        |
| <b>2019</b> | <b>11</b> | <b>23*</b> | <b>15.38</b> | <b>133.82</b> | <b>-0.26</b> | <b>0.80</b> |
| <b>2019</b> | <b>11</b> | <b>24*</b> | <b>8.081</b> | <b>146.97</b> | <b>-0.54</b> | <b>1.00</b> |

|             |           |            |              |               |              |             |
|-------------|-----------|------------|--------------|---------------|--------------|-------------|
| <b>2019</b> | <b>11</b> | <b>25*</b> | <b>3.02</b>  | <b>159.98</b> | <b>-0.77</b> | <b>0.83</b> |
| 2019        | 11        | 26*        | 0.43         | 172.46        | -0.92        | 0.56        |
| 2019        | 11        | 28*        | 2.83         | 160.63        | -0.97        | 0.71        |
| <b>2019</b> | <b>11</b> | <b>29*</b> | <b>7.28</b>  | <b>148.70</b> | <b>-0.99</b> | <b>0.97</b> |
| 2019        | 11        | 30         | 13.39        | 137.07        | -0.92        | 0.92        |
| <b>2019</b> | <b>12</b> | <b>15*</b> | <b>90.07</b> | <b>36.74</b>  | <b>0.97</b>  | <b>0.97</b> |
| <b>2019</b> | <b>12</b> | <b>16*</b> | <b>82.32</b> | <b>49.72</b>  | <b>0.86</b>  | <b>0.92</b> |
| 2019        | 12        | 17*        | 72.87        | 62.78         | 0.67         | 0.64        |
| 2019        | 12        | 18         | 62.22        | 75.85         | 0.41         | 0.42        |
| 2019        | 12        | 19         | 50.14        | 89.84         | 0.51         | 0.62        |
| <b>2019</b> | <b>12</b> | <b>20*</b> | <b>38.89</b> | <b>102.84</b> | <b>0.22</b>  | <b>0.90</b> |
| <b>2019</b> | <b>12</b> | <b>21*</b> | <b>28.27</b> | <b>115.76</b> | <b>-0.08</b> | <b>0.98</b> |
| 2019        | 12        | 22*        | 18.82        | 128.58        | -0.37        | 0.74        |
| 2019        | 12        | 23         | 10.99        | 141.28        | -0.63        | 0.48        |
| 2019        | 12        | 24*        | 4.80         | 154.69        | -0.54        | 0.54        |
| <b>2019</b> | <b>12</b> | <b>26*</b> | <b>0.01</b>  | <b>178.92</b> | <b>-0.91</b> | <b>1.00</b> |
| <b>2019</b> | <b>12</b> | <b>27*</b> | <b>0.90</b>  | <b>169.12</b> | <b>-0.98</b> | <b>0.83</b> |
| 2019        | 12        | 28*        | 3.77         | 157.60        | -0.98        | 0.56        |
